# Supplementary material for: Effects of marker type and filtering criteria on QST-FST comparisons
Source: R Soc Open Sci. 2019 Nov 6;6(11):190666. doi: 10.1098/rsos.190666 (PMC6894560; doi:10.1098/rsos.190666)
Supplement: R script for selection analysis [file rsos190666supp3.r]

# Inputs
#
# V1 - covariance matrix of optimal phenotypes
# G - the ancestral G matrix
# V3 - covariance matrix of fitness landscape
# V4 - the covariance matrix of residual effects
# X - gene flow matrix
# selOn - is selection on
# verbose - is the coancestry matrix computed
#
selection = function(V1,G,V3,V4,X,selOn=TRUE,verbose=TRUE){

	# Numbers
	d = ncol(G)	# dimension of phenotype
	n1 = 2 		# subpopulations
	n2 = 30		# generations
	n3 = 20 	# indivs per subpopulation
	n4 = 2		# traits
#	n4 = d
	n5 = 32 	# QTL's
	n6 = 5 		# alleles per locus
	n7 = 32 	# markers
	n8 = 5 		# alleles per marker
	n9 = 10		# how many to sample for markers
	n10 = 5		# no. of PAIRS for breeding design
	n11 = 5		# offspring per pair

	# Dumping parameters for reference
	dump(ls(pattern='V'),file="parameters.txt")
	dump(ls(pattern='G'),file="parameters.txt",append=TRUE)
	dump(ls(pattern='X'),file="parameters.txt",append=TRUE)
	dump(ls(pattern='n'),file="parameters.txt",append=TRUE)

	# Consistency check
	if( (!ncol(V1)==d) || (!ncol(V3)==d) || (!ncol(V4)==d) ){
		stop("inconsistent matrices")
		}
	if( (!nrow(V1)==d) || (!nrow(G)==d) || (!nrow(V3)==d) || (!nrow(V4)==d) ){
		stop("nonsquare matrices")
		}
	if( (!n1==ncol(X)) || (!n1==nrow(X)) ){
		stop("inconsistent gene flow matrix")
		}

	# Random effects for QTL alleles
	eff = random.effects(n5,n6,n4,G)

	# Optimal phenotypes
	theta = matrix(0,ncol=d,nrow=n1)
	library(MCMCpack) # includes MVN generator
	for( i in 1:n1 ){
		theta[i,] = mvrnorm(1,mu=rep(0,d),Sigma=V1)
		}

	# 'Distance from optimal phenotype' matrix
	V3inv = solve(V3)

	# Ancestral generation, id's, QTL data and phenotypes
	NIN = n1*n3
	id = 1:NIN
	Y = cbind(0,0,id,0,0,0)
	alleles = matrix(sample(1:n6,2*NIN*n5,replace=TRUE),nrow=NIN)
	Y = cbind(Y,alleles)

	# Realisation of G; phenotype regenerated without
	# environmental variation
	print("Desired G")
	print(G)
	print("Realised G")
	pheno2 = pheno.type(Y,eff,0.0001*V4,n4,n5)
	print(cov(pheno2[,7:ncol(pheno2)]))

	# Calculation
	for( i in 1:n2 ){
		print(paste("generation",i,"QTL data"))
		
		prevGen = Y[which(Y[,1]==(i-1)),]
		
		thisGen = mate(prevGen,X,V3inv,V4,eff,n1,n3,n4,n5,theta,i,selOn)
		Y = rbind(Y,thisGen)
		
		# Coancestry of individuals
		if( verbose ){
			popula = thisGen
			coanc = matrix(0,ncol=nrow(popula),nrow=nrow(popula))

			# First generation from first principles
			if( i==1 ){
				for( j in 1:ncol(coanc) ){
					for( i in 1:j ){
						if( popula[i,5]==popula[j,5] ){
							coanc[i,j] = coanc[i,j] + 0.125
							}
						if( popula[i,6]==popula[j,6] ){
							coanc[i,j] = coanc[i,j] + 0.125
							}
						if( i==j ){ coanc[i,j] = 0.5 }
						coanc[j,i] = coanc[i,j]
						}
					}
				}
			else{	# other generations by recursion
				TH = coancOld[,2:ncol(coancOld)]
				for( j in 1:ncol(coanc) ){
					for( i in 1:j ){
						s1 = which(coancOld[,1]==popula[i,5])
						s2 = which(coancOld[,1]==popula[j,5])
						d1 = which(coancOld[,1]==popula[i,6])
						d2 = which(coancOld[,1]==popula[j,6])
						coanc[i,j] = TH[s1,s2] + TH[s1,d2] + TH[d1,s2] + TH[d1,d2]
						coanc[j,i] = coanc[i,j]
						}
					}
				coanc = coanc / 4
				diag(coanc) = 0.5 + 0.5*diag(coanc)
				}

			# coancOld to be used for generations 2+
			coancOld = cbind(popula[,3],coanc)
			}				
		}

	# Averaging coancestry matrix
	if( verbose ){
		print("averaging coancestry matrix")
		coancPop = average.coanc(popula,coancOld)
		fst = (mean(diag(coancPop)) - mean(coancPop)) / (1 - mean(coancPop))
		print(paste("FST",fst))
		}

	# Saving coancestry matrix for reference
	dump(ls(pattern='coancPop'),file="coancMatrix.txt")

	# Molecular markers
	markerData = marker.data(Y,n7,n8)
	thisMark = markerData[which(markerData[,1]==n2),]

	# Simulating lab experiment
	print("breeding design and genotyping")
	help1 = lab(thisGen,thisMark,V4,n1,n4,n5,n9,n10,n11,eff)
	thisPhen = help1[[1]]
	thisMark = help1[[2]]
	
	# Writing data sets for estimation
	write.csv(thisPhen,file="traits.csv",row.names=FALSE)
	write.csv(thisMark,file="markerData.csv",row.names=FALSE)
	
	# Output
	outPut = as.list(1:5)
	outPut[[1]] = theta
	outPut[[2]] = Y
	outPut[[3]] = "phenotype not tracked"
	outPut[[4]] = markerData
	if( verbose ){ 
		outPut[[5]] = coancPop
		}
	else{	outPut[[5]] = 0
		} 
	breedingV = pheno.type(thisGen,eff,0.0001*V4,n4,n5)
	save(breedingV,file="breedingV.RData")
	return(outPut)
	}
 
# Subprogram for averaging coancestry matrix
average.coanc = function(popula,coancOld){
	NOP = max(popula[,2])
	coancPop = matrix(0,NOP,NOP)
	TH = coancOld[,2:ncol(coancOld)]
	for( j in 1:NOP ){
		for( i in 1:j ){
			popI = popula[which(popula[,2]==i),3]
			popJ = popula[which(popula[,2]==j),3]
			popI = which(coancOld[,1]==popI)
			popJ = which(coancOld[,1]==popJ)
			targetMass = TH[popI,popJ]
			coancPop[i,j] = mean(targetMass)
			coancPop[j,i] = coancPop[i,j]
			}
		}
	return(coancPop)
	}

# Subprogram for allele effects
random.effects = function(n5,n6,n4,G){

	# Covariance matrix of effects
	ftor = 2*n5*(1 - 1/n6)
	V2 = G / ftor
	
	# Output array
	library(MCMCpack) # includes multinormal generator
	outPut = array(0,dim=c(n5,n6,n4))
	for( i in 1:n5 ){
		for( j in 1:n6 ){
			outPut[i,j,] = mvrnorm(1,mu=rep(0,n4),Sigma=V2)
			}
		}
	return(outPut)
	}

# Exact matching of allele effects
random.match = function(n5,n6,n4,G,Y){
	eff = array(0,dim=c(n5,n6,n4))
	Gup = chol(G)
	for( i in 1:n5 ){
		for( j in 1:n6 ){
			eff[i,j,] = Gup %*% rnorm(n4,0,1)
			}
		}
	Eps = 0.02
	dat = pheno.type(Y,eff,0.0001*V4,n4,n5)
	Greal = cov(dat[,7:ncol(dat)])
	diff = 1
	while( diff > Eps ){
		eff = random.effects(n5,n6,n4,G)
		dat = pheno.type(Y,eff,0.0001*V4,n4,n5)
		Greal = cov(dat[,7:ncol(dat)])
		diff = max(abs(Greal-G))
		print(paste("matching G, diff",diff))
		}
	return(eff)
	}	

# Subprogram for phenotype calculation
pheno.type = function(A,eff,V4,n4,n5){
	NIN = nrow(A)
	genot = A[,7:ncol(A)]
	phenot = matrix(0,nrow=NIN,ncol=n4)
	for( i in 1:NIN ){

		# Additive genetic effects
		for( j in 1:n4 ){
			trait = 0
			for( k in 1:n5 ){
				chr1 = genot[i,-1+2*k]
				chr2 = genot[i,2*k]
				trait = trait + eff[k,chr1,j]
				trait = trait + eff[k,chr2,j]
				}
			phenot[i,j] = trait
			}

		# Residual effects
		phenot[i,] = phenot[i,] + mvrnorm(1,mu=rep(0,n4),Sigma=V4)
		}

	outPut = cbind(A[,1:6],phenot) # tags
	return(outPut)
	}

# Subprogram for mating
mate = function(prevGen,X,V3inv,V4,eff,n1,n3,n4,n5,theta,t,selOn){

	# How many individuals to produce per subpopulation
	Inf2 = 10*n3
	
	# Tags etc.
	NC = ncol(prevGen)
	NIN2 = n1*Inf2
	offSpring = matrix(0,ncol=NC,nrow=NIN2)
	offSpring[,1] = t
	offSpring[,2] = ceiling((1:NIN2)/Inf2)
	offSpring[,3] = 1:NIN2

	# Random offsprings, no selection
	for( i in 1:NIN2 ){

		# Sampling subpopulations
		if( t==1 ){ 	# first divergent generation
			pat = prevGen
			mat = prevGen
			}
		else{ 		# further generations
			chances = X[offSpring[i,2],]
			pat = prevGen[which(prevGen[,2]==sample(1:n1,1,prob=chances)),]
			mat = prevGen[which(prevGen[,2]==sample(1:n1,1,prob=chances)),]
			}

		# Sampling individuals
		pat = sample(pat[,3],1)
		mat = sample(mat[,3],1)
		patGen = prevGen[which(prevGen[,3]==pat),7:NC]
		matGen = prevGen[which(prevGen[,3]==mat),7:NC]

		# Random inheritance
		thisGenot = 0*matGen
		for( j in 1:n5 ){
			patLoc = patGen[(-1+2*j):(2*j)]
			matLoc = matGen[(-1+2*j):(2*j)]
			thisGenot[-1+2*j] = patLoc[floor(runif(1,1,3))]
			thisGenot[2*j] = matLoc[floor(runif(1,1,3))]
			}

		# Data up
		offSpring[i,5] = pat
		offSpring[i,6] = mat
		offSpring[i,7:NC] = thisGenot
		}

	# Fenotype and fitness
	phenot = pheno.type(offSpring,eff,V4,n4,n5)
	fit = fitness(phenot,theta,V3inv,t,selOn)
		
	# Selection
	genot = 0*offSpring[1,]
	for( i in 1:n1 ){
		thisPop = offSpring[which(offSpring[,2]==i),]
		thisFit = fit[which(offSpring[,2]==i),2]
		surv = sample(1:Inf2,n3,prob=thisFit,replace=FALSE)
		genot = rbind(genot,thisPop[surv,])
		}
	genot = genot[2:nrow(genot),]
	M = max(prevGen[,3])
	genot[,3] = M + 1:nrow(genot) # avoiding duplicate id's
	return(genot)
	}

# Subprogram for fitness
fitness = function(prevPhen,theta,V3inv,t,selOn){
	NIN = nrow(prevPhen)
	phenot = prevPhen[,7:ncol(prevPhen)]
	fit = rep(0,NIN)
	for( i in 1:NIN ){
		ph = phenot[i,]
		if( t==1 ){ th = rep(0,length(ph)) } # first generation
		else{ th = theta[prevPhen[i,2],] }
		dist = t(ph-th) %*% V3inv %*% (ph-th)
		fit[i] = exp(-dist)
		}
	if( !selOn ){ # a trivial way to model random drift
		fit = 1 + 0*fit
		}
	fit = cbind(prevPhen[,3],fit)
	return(fit)
	}

# Subprogram for neutral allele flow
marker.data = function(genot,n7,n8){
	stuff = genot[,1:6] # removing QTL data
	p = as.list(1:n7)
	for( i in 1:n7 ){ # ancestral allele frequency
		p[[i]] = rep(1/n8,n8)
		}
	ngen = max(stuff[,1])
	for( i in 1:n7 ){
		print(paste("locus",i,"marker data"))
		stuff = cbind(stuff,0,0)
		loc1 = ncol(stuff) - 1
		loc2 = ncol(stuff)
		types = 1:length(p[[i]])
		ancs = which(stuff[,1]==0)
		stuff[ancs,loc1] = sample(types,length(ancs),replace=TRUE,prob=p[[i]])
		stuff[ancs,loc2] = sample(types,length(ancs),replace=TRUE,prob=p[[i]])
		for( t in 1:ngen ){
			target = which(stuff[,1]==t)
			for( k in target ){ # random inheritance
				pat = which(stuff[k,5]==stuff[,3])
				mat = which(stuff[k,6]==stuff[,3])
				if( runif(1,0,1)<0.5 ){
					stuff[k,loc1] = stuff[pat,loc1]
					}
				else{	stuff[k,loc1] = stuff[pat,loc2]
					}
				if( runif(1,0,1)<0.5 ){
					stuff[k,loc2] = stuff[mat,loc1]
					}
				else{	stuff[k,loc2] = stuff[mat,loc2]
					}
				}
			}
		}
	return(stuff)
	}

# A function for simulating lab experiment
lab = function(thisGen,thisMark,V4,n1,n4,n5,n9,n10,n11,eff){

	# Trivial tags for phenotypes
	NC = ncol(thisGen)
	NIN = n1*n10*n11
	nin1 = n10*n11 # per population
	offSpring = matrix(0,ncol=NC,nrow=NIN)
	offSpring[,1] = 1 + max(thisGen[,1])
	offSpring[,2] = sapply(1:NIN,function(x)ceiling(x/nin1))
	offSpring[,3] = 1:NIN + max(thisGen[,3])
	offSpring[,4] = 0

	# Randomizing parents
	for( i in 1:n1 ){
		thisPop = thisGen[which(thisGen[,2]==i),]
		patsMats = sample(thisPop[,3],2*n10,replace=FALSE)
		pats = patsMats[1:n10]
		mats = patsMats[(n10+1):length(patsMats)]
		target = which(offSpring[,2]==i)
		offSpring[target,5] = pats
		offSpring[target,6] = mats
		}		

	# Random inheritance in QTL's
	for( i in 1:NIN ){
		pat = offSpring[i,5]
		mat = offSpring[i,6]
		patGen = thisGen[which(thisGen[,3]==pat),7:NC]
		matGen = thisGen[which(thisGen[,3]==mat),7:NC]
		thisGenot = 0*matGen
		for( j in 1:n5 ){
			patLoc = patGen[(-1+2*j):(2*j)]
			matLoc = matGen[(-1+2*j):(2*j)]
			thisGenot[-1+2*j] = patLoc[floor(runif(1,1,3))]
			thisGenot[2*j] = matLoc[floor(runif(1,1,3))]
			}
		offSpring[i,7:NC] = thisGenot
		}

	# Resultant phenotype, no selection
	phenot = pheno.type(offSpring,eff,V4,n4,n5)

	# Taging parents' populations
	labPhen = cbind(phenot[,1:6],0,0,phenot[,7:ncol(phenot)])
	labPhen[,7] = labPhen[,8] = labPhen[,2] # PRESENTLY EASY
	colnames(labPhen) = c("generation","subpop","ID","sex","sire","dam","sire pop","dam pop",rep("trait",n4))

	# Genotyping a subset of natural populations
	labMark = thisMark[1,]
	for( i in 1:n1 ){
		thisPop = thisMark[which(thisMark[,2]==i),]
		toTake = sample(1:nrow(thisPop),n9,replace=FALSE)
		labMark = rbind(labMark,thisPop[toTake,])
		}
	labMark = labMark[2:nrow(labMark),]
	nMarker = ncol(labMark) - 6
	colnames(labMark) = c("generation","subpop","ID","sex","sire","dam",rep("marker",nMarker))

	# Output
	OP = as.list(1:2)
	OP[[1]] = labPhen
	OP[[2]] = labMark
	return(OP)
	}

# A program for plotting phenotypes
pheno.plot = function(theta,NOP=nrow(theta)){
	colVec = c("black","green","blue","cyan","orange","red","purple","gray")
	library(car)
	realised = as.matrix(read.csv("traits.csv"))
	trait1col = 9
	trait2col = 10
	XL = c(min(realised[,trait1col]),max(realised[,trait1col]))
	YL = c(min(realised[,trait2col]),max(realised[,trait2col]))
	plot(theta[1:NOP,1],theta[1:NOP,2],main="Phenotypes: data ellipses and optimal dots",xlim=XL,ylim=YL,col=colVec,pch=18,xlab="trait 1",ylab="trait 2")
	for( i in 1:NOP ){
		thisPop = realised[which(realised[,2]==i),trait1col:trait2col]
		data.ellipse(thisPop,center.pch=3,lwd=1,col=colVec[i],plot.points=FALSE,levels=0.68)
		}
	return("done")
	}
